# Supplementary material
Source: PubMed Central journal article supplement (PMC3147943)
Supplement: supp_85_15_7504__1.pdf [file supp_85_15_7504__1.pdf]

**SUPPLEMENTAL MATERIALS**

**Table S1.** Primers used for amplification of PB1, PB2, PA, and NP

| ORF           | Direction | Sequence (5'-3')                                               |
|---------------|-----------|----------------------------------------------------------------|
| FluA-PB1      | FOR       | CCCCAAGCTTGATATCGCGGCCGCCACCATGGATGTCAATCCGACCTT               |
|               | REV       | CGCGTCGACGGTACCTATTTTTGCCGTCTGAGCTCTT                          |
| FluA-PB2cFLAG | FOR       | CGCGGATCCCGGGCGGCCGCCACCATGGAAAGAATAAA AGAACTAAGAAATCT         |
|               | REV       | GCGGATCCTTATCACTTGTCGTCGTCATCCTTGTAGTCATTGATGGCCATCCGAATTC     |
| FluA-PA       | FOR       | GATCCCGGGCCGCCACCATGGAAGATTTTGTGCGACA ATG                      |
|               | REV       | CGTAGGATCCTATTTTAATGCATGTGTCAGGAA                              |
| FluA-NP       | FOR       | TCGACGGTACCAGCTGAAGCTTGCTAGCGGCCGCCACCATGGCGTCCCA AGGCACCAAACG |
|               | REV       | GGAATTCATCTTAATTGTCGTA CTCTCTGCATTGT                           |
| FluB-PB1      | FOR       | GATCTCGAGCCGCCACCATGAATATAAATCCTTATTTTTCTCTTCAT                |
|               | REV       | CCCTCGAGTTATGTGTACCCAATCTCACCA                                 |
| FluB-PB2cFLAG | FOR       | GATCTCGAGCCGCCACCATGACATTGGCTAAAATTGAA                         |
|               | REV       | GCGGATCCTTACTTGTCGTCGTCATCCTTGTAGTCGCTCAAGGCCACC               |
| FluB-PA       | FOR       | GATCTCGAGCCGCCACCATGGATACTTTTAT TACAAGAACTCC                   |
|               | REV       | CCCTCGAGTTATTCATCCATTATTTTCATCTACT                             |
| FluB-NP       | FOR       | TAGGTACCGCCGCCACCATGTCCAACATGGATATTGACG                        |
|               | REV       | TAATAATCGAGGTC ATCATAATCC                                      |

FOR: forward, REV: reverse

1 **Table S2.** Primers for preparation of PB2 mutants

| Strain  | Position | Forward primer sequence (5'-3') | Reverse primer sequence (5'-3') |
|---------|----------|---------------------------------|---------------------------------|
| A/PA/99 | H357W    | GATAAGAGTGTGGGAGGGATAT          | CTCATACCCCTCCCATACTCTTATTTTC    |
|         | H357F    | GATAAGAGTATTTGAGGGGTATGAG       | CTCATACCCCTCAAATACTCTTATC       |
|         | H357L    | GATAAGAGTGCTTGAGGGATATG         | CATATCCCTCAAGCACTCTTATC         |
|         | E361A    | GGTATGCGGAGTTCACAATG            | CATTGTGAACTCCGCATACC            |
|         | K376A    | CTATACTCAGAGCAGCAACC            | GGTTGCTGCTCTGAGTATAG            |
|         | F404W    | CCATGGTGTGGTCACAAGAG            | CTCTTGTGACCACACCATGG            |
|         | F404L    | GCCATGGTACTGTCAACAAGAG          | CTCTTGTGACAGTACCATGGC           |
|         | B/SH/02  | Q325A                           | GACAAAGAGCAAGATTTGGAC           |
| Q325N   |          | GACAAAGAAACAGATTTGGACG          | CGTCCAAATCTGTTTCTTTGTC          |
| Q325K   |          | GACAAAGAAAGAGATTTGGACG          | CGTCCAAATCTCTTTCTTTGTC          |
| Q325R   |          | GACAAAGACGGAGATTTGGAC           | GTCCAAATCTCCGTCTTTGTC           |
| E363A   |          | GGAGAAGCAGAGTTCCATG             | CATGGAACCTGCTTCTCC              |
| E363D   |          | GGAGAAGACGAGTTCCATG             | CATGGAACCTGCTTCTCC              |
| K378A   |          | GGAATATTA AAAAGCGAGCAAAATGAG    | CTCATTTTGCTCGCTTTTAATATCC       |
| W359H   |          | GATTGGAATACATGACGGAGAAG         | CTTCTCCGTCATGTATTCCAATC         |
| W359L   |          | GATTGGAATACTTGACGGAGAAG         | CTTCTCCGTC AAGTATTCCAATC        |
| W359F   |          | GATTGGAATATTCGACGGAGAAG         | CTTCTCCGTCGAATATTCCAATC         |
| F406Y   |          | GTGCATGGTATACTCTCAAGAC          | GTCTTGAGAGTATACCATGCAC          |
| F406L   |          | TGCATGGTACTGTCTCAAGAC           | GTCTTGAGACAGTACCATGCA           |

1           **Figure S1.** The comparison of the capped RNA cleavage activity among FluA  
2 strains and among FluB strains. (A) Proteins in purified virions (lanes 1 and 3) and  
3 vRNP (lanes 2 and 4) of FluA (lanes 1 and 2) and FluB (lanes 3 and 4) were separated  
4 through 11% SDS-PAGE containing 4 M urea and stained with CBB. (B) *In vitro*  
5 capped RNA cleavage reactions were performed using 600 ng of FluA (lanes 2 to 4) and  
6 FluB (lanes 5 and 6) vRNP with m<sup>7</sup>GpppGm-RNA (lanes 1 to 6). Synthesized RNA  
7 products were analyzed by 15% PAGE containing 8 M urea. PA, A/Panama/2007/99  
8 (H3N2); BJ, A/Beijing/262/95 (H3N2); PR, A/Puerto Rico/8/34 (H1N1); SH,  
9 B/Shanghai/361/2002; and Mie, B/Mie/1/93. The input capped RNAs (33 nt) and  
10 cleaved capped RNA products are indicated as closed and open triangles in the right of  
11 panel, respectively.

12  
13           **Figure S2.** Characterization of RNA elongation reaction products. (A) The  
14 elongated products corresponding to eight full-length segments. The vRNA templates  
15 purified from FluA (lane 1) and FluB (lane 2) vRNPs were analyzed by 4% PAGE  
16 containing 8 M urea, and then detected by silver staining. The elongated products  
17 synthesized in *in vitro* RNA elongation reaction were analyzed by 4% PAGE containing  
18 8 M urea, and then detected by autoradiography (FluA: lane 3, FluB: lane 4). (B)  
19 Detection of the poly(A)<sup>+</sup> elongated products. The poly(A)<sup>+</sup> and poly(A)<sup>-</sup> elongated  
20 products (FluA: lanes 1 to 3, FluB: lanes 4 to 6) were separated using Oligotex<sup>TM</sup>-dT30  
21 <Super> (TaKaRa) according to the manufacturer's instruction. A cap1-poly(A) (as a  
22 positive control for poly(A)<sup>+</sup>, 33 nt) and 53-merVwt (as a negative control for poly(A)<sup>-</sup>,  
23 5'-AGUAGAAACAAGGGUGUUUUUCAUAUCAUUUAAACUUCACCCUGCUU  
24 UUGCU-3') (4) were also subjected to poly(A) selection and analyzed by 10% PAGE

1 containing 8 M urea.

2

3 **Figure S3.** Effect of mutations at the ribose stacking residue (Phe323) in FluA  
4 PB2 on the transcription activity. The transcription activity in the mini-replicon system  
5 was measured as FIG. 4. The firefly luciferase activity was normalized as that relative  
6 to the renilla luciferase activity. These results are averages with SD from four  
7 independent experiments.

8

9 **Figure S4.** The model for the interaction of m<sup>7</sup>GTP with the cap-binding domain  
10 of FluB PB2. The models of wild type (A), Glu363Asp mutant (B), and Gln325Arg and  
11 Glu363Asp double mutant (C). In the case of wild type, the stacking interaction (purple  
12 circle) between Trp359 and methylated base and hydrogen bonds (green dotted lines)  
13 between Glu363 and guanine base and between Gln325 and ribose of guanosine forms  
14 the pocket for cap recognition. The Asp363 replaced for Glu363 could make no or  
15 weak hydrogen bonds with guanine possibly due to the longer distance (B). Arg325  
16 replaced for Gln325 could generate hydrogen bonds with ribose more stably than  
17 Gln325. Alternatively, the interaction between Arg325 and ribose may relocate guanine  
18 base so as to make the interaction with Asp363 more stable (B).

19

20 **Figure S5.** The conserved mode of m<sup>7</sup>G binding by four cap-binding proteins.  
21 The structures of four cap-binding domains with m<sup>7</sup>G binding are drawn as relative  
22 configuration of two aromatic residues sandwiching the methylated base and the acidic  
23 residue interacting with the N1 and/or N2 positions of the guanine. (A) Influenza A  
24 virus polymerase PB2 cap-binding domain (1) (pdb entry code 2vqz), (B) Human

- 1 translation initiation factor, eIF4E (5, 6) (pdb entry code 1ipc), (C) 20 kDa human
- 2 nuclear cap-binding protein, CBP20 (3) (pdb entry code 1h2t), and (D) Vaccinia virus
- 3 (nucleoside-2'-*O*-)-methyltransferase, VP39 (2) (pdb entry code 4dcg).
- 4

## SUPPLEMENTAL REFERENCES

- 1  
2  
3 1. **Guilligay, D., F. Tarendeau, P. Resa-Infante, R. Coloma, T. Crepin, P. Sehr,**  
4 **J. Lewis, R. W. Ruigrok, J. Ortin, D. J. Hart, and S. Cusack.** 2008. The  
5 structural basis for cap binding by influenza virus polymerase subunit PB2. *Nat*  
6 *Struct Mol Biol* **15**:500-6.
- 7 2. **Hu, G., P. D. Gershon, A. E. Hodel, and F. A. Quioco.** 1999. mRNA cap  
8 recognition: dominant role of enhanced stacking interactions between  
9 methylated bases and protein aromatic side chains. *Proc Natl Acad Sci U S A*  
10 **96**:7149-54.
- 11 3. **Mazza, C., A. Segref, I. W. Mattaj, and S. Cusack.** 2002. Large-scale induced  
12 fit recognition of an m(7)GpppG cap analogue by the human nuclear  
13 cap-binding complex. *Embo J* **21**:5548-57.
- 14 4. **Shimizu, K., H. Handa, S. Nakada, and K. Nagata.** 1994. Regulation of  
15 influenza virus RNA polymerase activity by cellular and viral factors. *Nucleic*  
16 *Acids Res* **22**:5047-53.
- 17 5. **Tomoo, K., X. Shen, K. Okabe, Y. Nozoe, S. Fukuhara, S. Morino, T. Ishida,**  
18 **T. Taniguchi, H. Hasegawa, A. Terashima, M. Sasaki, Y. Katsuya, K.**  
19 **Kitamura, H. Miyoshi, M. Ishikawa, and K. Miura.** 2002. Crystal structures  
20 of 7-methylguanosine 5'-triphosphate (m(7)GTP)- and  
21 P(1)-7-methylguanosine-P(3)-adenosine-5',5'-triphosphate (m(7)GpppA)-bound  
22 human full-length eukaryotic initiation factor 4E: biological importance of the  
23 C-terminal flexible region. *Biochem J* **362**:539-44.
- 24 6. **Tomoo, K., X. Shen, K. Okabe, Y. Nozoe, S. Fukuhara, S. Morino, M.**

1           **Sasaki, T. Taniguchi, H. Miyagawa, K. Kitamura, K. Miura, and T. Ishida.**  
2           2003. Structural features of human initiation factor 4E, studied by X-ray crystal  
3           analyses and molecular dynamics simulations. *J Mol Biol* **328**:365-83.  
4  
5
